# Supplementary material for: Comparative RNA-Seq profiling of berry development between table grape ‘Kyoho’ and its early-ripening mutant ’Fengzao’
Source: PubMed Central journal article supplement (PMC5059895; doi:10.1186/s12864-016-3051-1), 2016-10-12

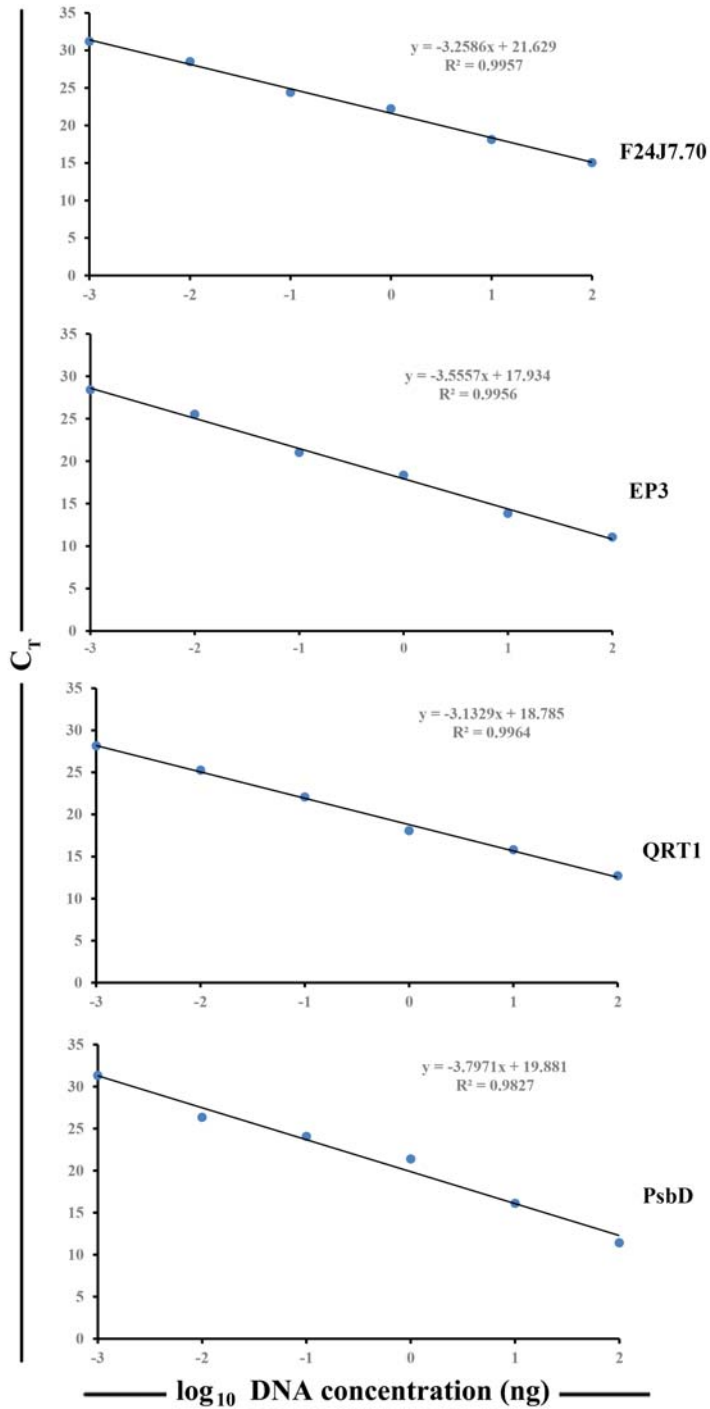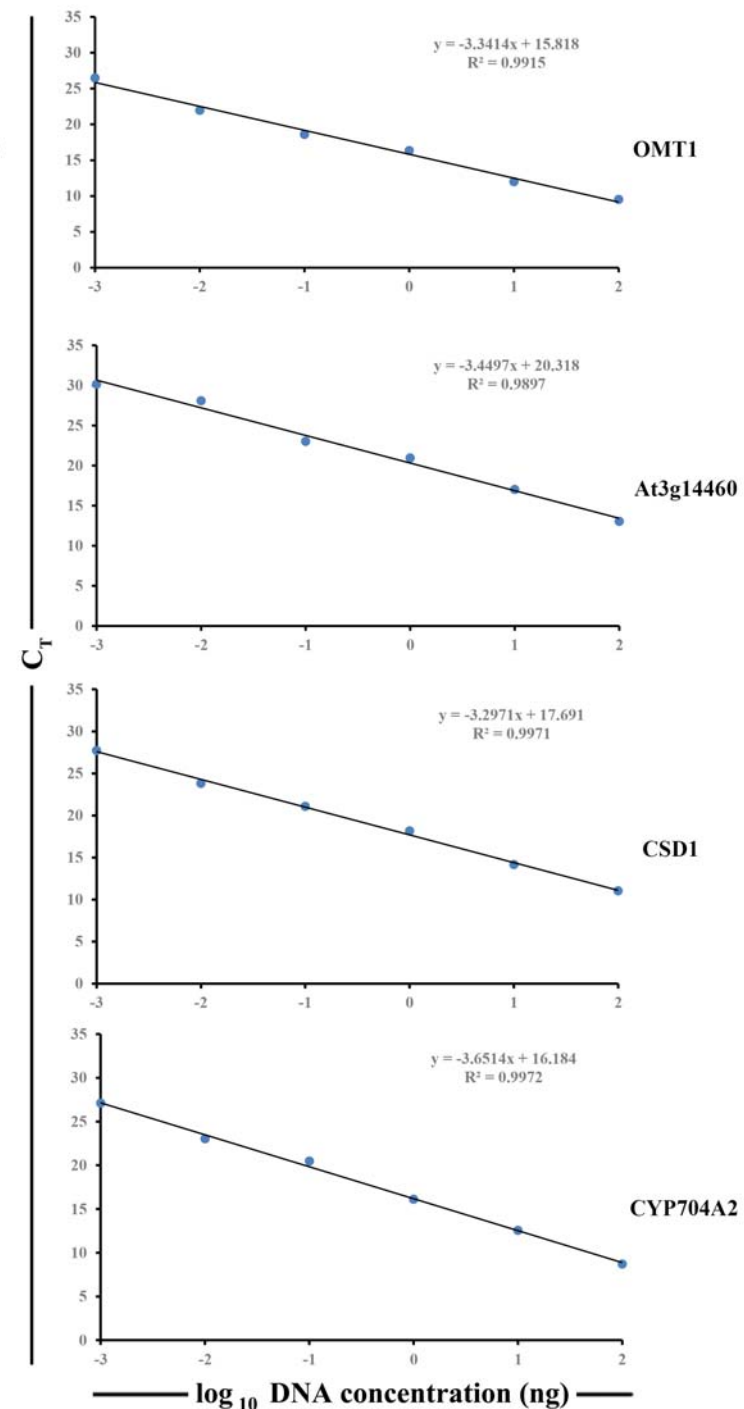

Supplement: 12864_2016_3051_MOESM6_ESM.pdf [file 12864_2016_3051_MOESM6_ESM.pdf]
